# Supplementary material for: Metabolomic Analysis of Cricket paralysis virus Infection in Drosophila S2 Cells Reveals Divergent Effects on Central Carbon Metabolism as Compared with Silkworm Bm5 Cells
Source: PubMed Central journal article supplement (PMC7232303; doi:10.3390/v12040393), 2020-04-01
Supplement: viruses-12-00393-s001.pdf [file viruses-12-00393-s001.pdf]

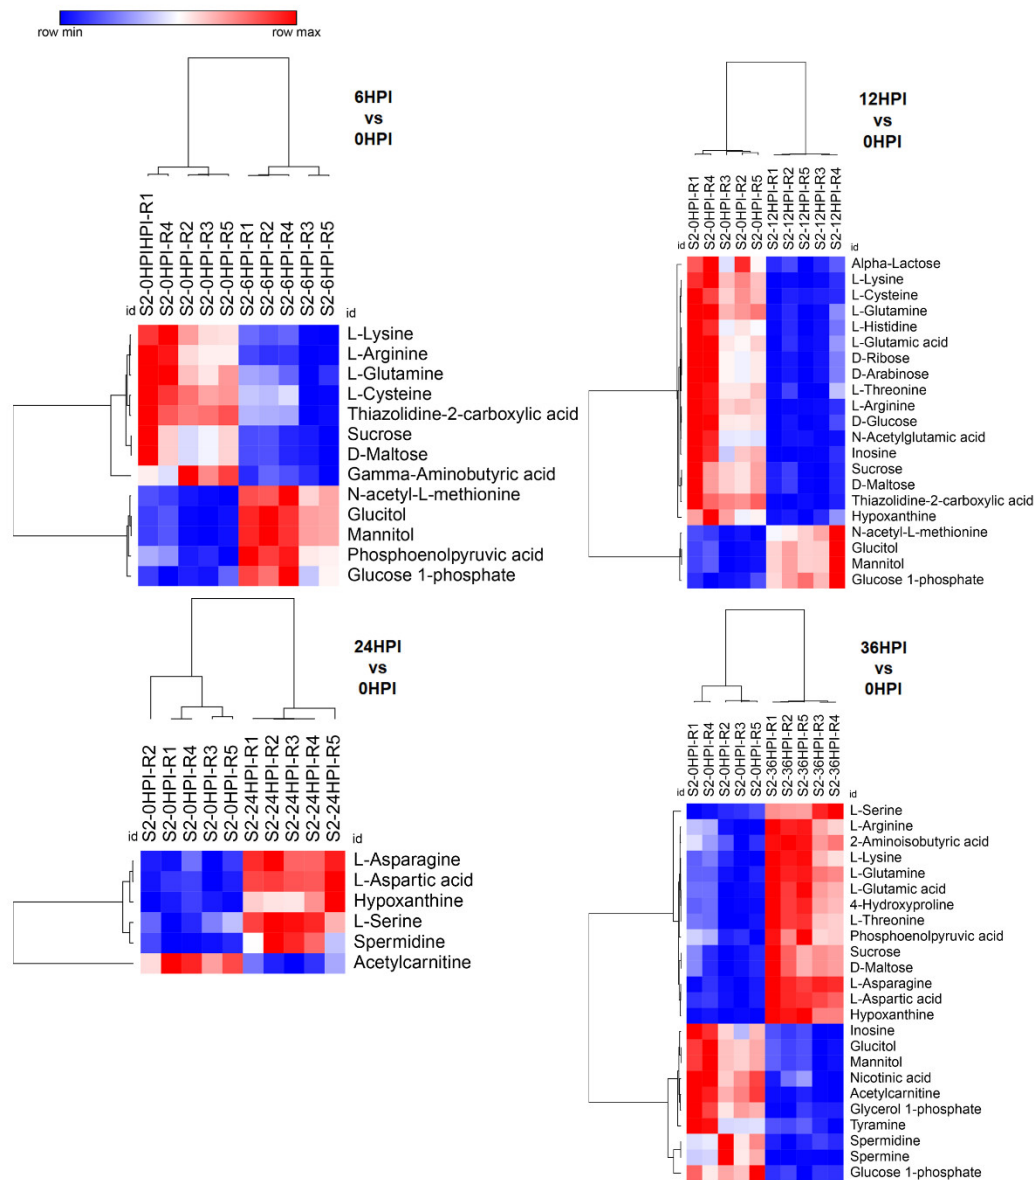

**Figure S1:** Heat maps of abundance of metabolites at different time points after CrPV infection: comparison with uninfected cells. Hierarchical clustering (one minus Pearson correlation) was used to separate individual samples (X-axis). The Y-axis represents individual metabolites that were identified and showed changes in abundance with respect to preceding and following time points ( $p < 0.05$ ). Normalized signal intensities are visualized as a color spectrum in the heat maps. Red and blue represent higher and lower expression, respectively, of metabolites.

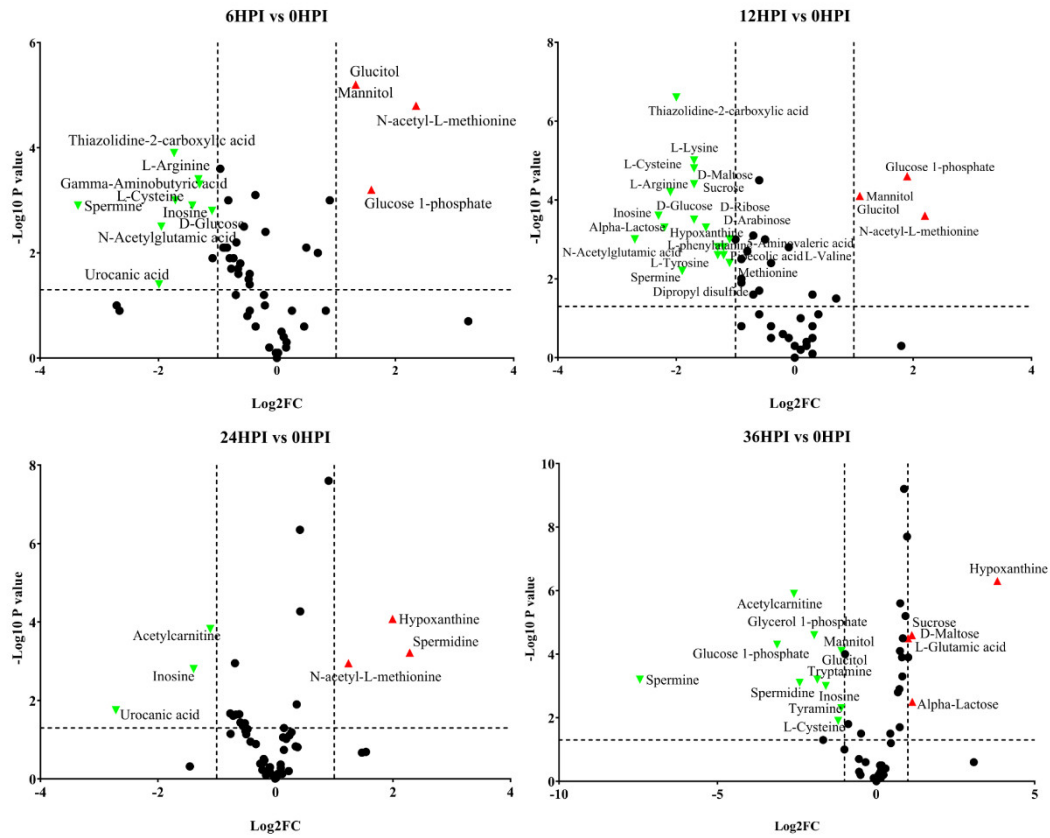

**Figure S2:** Volcano plots of all identified metabolites in S2 cells at different time points of CrPV infection: comparison with uninfected cells. In the volcano plot, the log scaled value of the fold change (FC, x-axis) is plotted against the  $-\log_{10} p$ -value from multiple  $t$ -test analysis (y-axis). The dashed lines delineate metabolites with fold change  $> 2$  and  $p$ -value  $< 0.05$ . Compound identities are displayed for both upregulated (right side; red upward triangle) or downregulated (left side; green downward triangle) metabolites.

**Table S1.** Peak abundance ratio of identified metabolites in CrPV-infected S2 cells. Red and blue colors represent a significant ( $p < 0.05$ ) increase and decrease in abundance, respectively (compared to uninfected cells). Values represent normalized abundance levels for each metabolite.

|                          | 6 hours | 12 hours | 24 hours | 36 hours |
|--------------------------|---------|----------|----------|----------|
| <i>Amino Acids</i>       |         |          |          |          |
| L-Arginine               | 0.54    | 0.32     | 1.25     | 2.38     |
| L-Asparagine             | 0.87    | 0.79     | 1.16     | 1.60     |
| L-Aspartic acid          | 0.71    | 0.88     | 1.53     | 1.60     |
| L-Cysteine               | 0.90    | 0.94     | 3.21     | 1.30     |
| L-Glutamic acid          | 0.71    | 0.63     | 1.33     | 2.08     |
| L-Glutamine              | 0.82    | 0.68     | 1.17     | 1.80     |
| L-Histidine              | 0.89    | 0.63     | 1.19     | 1.96     |
| L-Isoleucine             | 0.96    | 0.71     | 1.18     | 1.79     |
| L-Leucine                | 0.96    | 0.71     | 1.18     | 1.79     |
| L-Lysine                 | 0.63    | 0.39     | 1.26     | 2.48     |
| L-Methionine             | 1.01    | 0.74     | 1.12     | 1.70     |
| L-phenylalanine          | 1.04    | 0.73     | 1.13     | 1.76     |
| L-Proline                | 0.97    | 0.73     | 1.16     | 1.82     |
| L-Serine                 | 0.88    | 0.81     | 1.11     | 1.58     |
| L-Threonine              | 0.93    | 0.73     | 1.18     | 1.80     |
| L-Tyrosine               | 1.08    | 0.75     | 1.12     | 1.75     |
| L-Valine                 | 0.96    | 0.70     | 1.15     | 1.78     |
| N-Acetyl-Methionine      | 2.62    | 2.36     | 1.22     | 0.86     |
| N-Acetyl-Glutamic acid   | 0.56    | 0.34     | 1.28     | 2.68     |
| L-Pyro-Glutamic acid     | 0.81    | 0.84     | 1.32     | 1.75     |
| 4-Hydroxy-Proline        | 0.90    | 0.77     | 1.19     | 1.88     |
| <i>Carbohydrates</i>     |         |          |          |          |
| D-Arabinose              | 1.01    | 0.71     | 1.08     | 1.70     |
| D-Fructose               | 0.45    | 3.62     | 8.26     | 0.00     |
| D-Galactose              | 0.45    | 3.67     | 8.41     | 2.06     |
| D-Glucose                | 0.79    | 0.53     | 1.10     | 1.86     |
| D-Maltose                | 0.57    | 0.31     | 1.22     | 2.20     |
| D-Ribose                 | 1.01    | 0.71     | 1.08     | 1.70     |
| Alpha-lactose            | 0.49    | 0.22     | 1.31     | 2.27     |
| Glucitol                 | 2.14    | 1.83     | 0.90     | 0.40     |
| Mannitol                 | 2.14    | 1.83     | 0.90     | 0.40     |
| Gluconic acid            | 1.30    | 1.07     | 1.06     | 1.23     |
| Glucose-1-phosphate      | 2.16    | 2.71     | 0.63     | 0.08     |
| Sucrose                  | 0.57    | 0.31     | 1.22     | 2.20     |
| <i>Other metabolites</i> |         |          |          |          |
| Acetylcarnitine          | 1.96    | 1.67     | 0.64     | 0.23     |

|                                |      |      |      |      |
|--------------------------------|------|------|------|------|
| 2-Aminoisobutyric acid         | 0.67 | 0.62 | 1.14 | 1.89 |
| 4-Aminobutyric acid            | 0.67 | 1.09 | 1.41 | 0.82 |
| 5-Aminovaleric acid            | 0.96 | 0.70 | 1.15 | 1.78 |
| Citric acid                    | 1.30 | 1.33 | 1.51 | 1.61 |
| Cyclohexylamine                | 1.56 | 1.33 | 1.13 | 1.26 |
| Dipropyldisulfide              | 1.01 | 0.74 | 1.13 | 1.72 |
| Glyceraldehyde                 | 1.47 | 1.58 | 1.10 | 0.90 |
| Glycerol                       | 5.47 | 1.96 | 0.21 | 4.93 |
| Glycerol-1-phosphate           | 1.86 | 1.46 | 1.16 | 0.30 |
| L-Gulonic_Acid Gamma Lactone   | 2.21 | 0.96 | 1.12 | 1.46 |
| Hypoxanthine                   | 0.22 | 0.12 | 1.38 | 4.89 |
| Imidazolepropionic acid        | 1.00 | 0.84 | 1.11 | 1.01 |
| Inosine                        | 1.31 | 0.72 | 1.34 | 1.17 |
| 3-Methyl-2-Cyclohexen-1-one    | 1.10 | 0.99 | 1.02 | 1.18 |
| Nicotinic_acid                 | 1.47 | 1.20 | 0.85 | 0.69 |
| Pantothenic_acid               | 1.21 | 1.14 | 1.43 | 1.24 |
| 3-Phenylpropionic acid         | 0.99 | 1.04 | 1.09 | 0.98 |
| Phospho(enol)pyruvic acid      | 1.94 | 1.41 | 0.98 | 1.74 |
| Pipecolic_acid                 | 0.93 | 0.75 | 1.14 | 1.77 |
| Spermidine                     | 0.88 | 1.62 | 4.71 | 0.18 |
| Spermine                       | 0.47 | 1.35 | 5.71 | 0.03 |
| Thiazolidine-2-carboxylic acid | 0.61 | 0.49 | 2.40 | 1.11 |
| Tryptamine                     | 1.38 | 1.30 | 1.45 | 0.54 |
| Tyramine                       | 1.41 | 1.02 | 1.13 | 0.90 |
| Urocanic acid                  | 0.35 | 0.74 | 0.21 | 0.44 |
